# Supplementary material
Source: PubMed Central journal article supplement (PMC4847625)
Supplement: 10.1194_M060574_jlr.M060574-1.pdf [file 10.1194_M060574_jlr.M060574-1.pdf]

**Supplemental Tables:****Supplemental Tables 1: qRT-PCR primer design**

| <i>Primer (qRT-PCR)</i> | <i>Sequence</i>                                      |
|-------------------------|------------------------------------------------------|
| 36B4                    | 5'- CCCACTTACTGAAAAGGTCA<br>3'- TTAGTCGAAGAGACCGAATC |
| aP2 (mouse)             | 5'- ACATGAAAGAAGTGGGAGTG<br>3'- GGTTATGATGCTCTTCACCT |
| C/EBP $\alpha$ (mouse)  | 5'- CAAGAACAGCAACGAGTACC<br>3'- TTGACCAAGGAGCTCTCAG  |
| Caspase3 (mouse)        | 5'- ACTTCCATAAGAGCACTGCA<br>3'- ACCATGGCTTAGAATCACAC |
| CDS1 (human)            | 5'- CCTTGTCATCCAAAATCTGT<br>3'- GAATCCTTCCCAAGTCTTTT |
| CDS1 (mouse)            | 5'- CGCACGTCACTTTACTGATA<br>3'- GAATCCTTCCCAAGTCTTCT |
| CDS2 (human)            | 5'- GGCTACAACGTCTACCACTC<br>3'- GAACCGGTGGTATTTACTGA |
| CDS2 (mouse)            | 5'- TGGTTTATTGTTCCCATCTC<br>3'- AGCATCTGTACCCAGACATC |
| GAPDH                   | 5'- AGAAGGCTGGGGCTCATTG<br>3'- AGGGGCCATCCACAGTCTTC  |
| LPIN1 (human)           | 5'- CGACCTTCAACACCTAAAAG<br>3'- AGTGTCTGAAGATTCGCTGT |
| PPAR $\gamma$ (mouse)   | 5'- ACCACAGTTGATTTCTCCAG<br>3'- TAGAGCTGGGTCTTTTCAGA |

|                        |                                                      |
|------------------------|------------------------------------------------------|
| Pref1 (mouse)          | 5'- CCATGAAAGAGCTCAACAAG<br>3'- TACTGCAACAGGAGGTTCTT |
| $\beta$ -Actin (human) | 5'- AGCGAGCATCCCCAAAGTT<br>3'- GGGCACGAAGGCTCATCATT  |

Supplemental Tables 2: siRNA sequences

| <i>Gene</i> | <i>Sequence</i>            | <i>Supplier</i>             |
|-------------|----------------------------|-----------------------------|
| Human CDS1  | 5'- 3' CUCACUUCCACCCUUCUA  | Sigma Aldrich               |
| Human CDS2  | 5'- 3' CUUGUUAUCCACAACCUAU | Sigma Aldrich               |
| Mouse CDS1  | 5'- 3' CAGGUUUGACUGUCAGUAU | Sigma Aldrich               |
| Mouse CDS2  | 5'- 3' GAUUAAGUGUUUCCAUGAA | Sigma Aldrich               |
| Human LPIN1 | 5'- 3' GCAUGAAUCAUCCUCCAGU | Sigma Aldrich               |
| Mouse LPIN1 | 5'- 3' GAGACAACGGAGAAGCAU  | Sigma Aldrich               |
| Human CDS1  | CDS1-homo-1111             | Shanghai GenePharma Co. Ltd |
| Human CDS2  | CDS2-homo-1497             | Shanghai GenePharma Co. Ltd |
| Mouse CDS1  | CDS1-mus-534               | Shanghai GenePharma Co. Ltd |
| Mouse CDS2  | CDS2-mus-248               | Shanghai GenePharma Co. Ltd |

**Supplemental Figure:**

Supplemental Figure S1: A-C: HeLa cells were transfected with negative control siRNA (siCTRL; A), si*CDS1* (B), or si*CDS2* (C) for 48 h, and then treated with 200  $\mu$ M oleate for 16 h. 3D rendering using Huygens Essential Software was carried out on Z-stack images taken from confocal microscopy.
